# Supplementary material
Source: HighWire-hosted journal article supplement (https://diabetes.diabetesjournals.org/content/suppl/2006/06/29/55.7.2153)

Supplemental Information

a

- C57BL/10J
- C57BL/10ScN
- C57BL/10ScSn
- C57BL/10SnJ
- C57BL/6By
- \* C57BL/6J
- C57BL/6JEi
- C57BLKS/J
- C57BR/cdJ
- C57L/J
- C3H/HeH
- C58/J
- CBA/J
- DBA/1J
- I/LnJ
- NOD/LtJ
- NON/LtJ
- R111S/J
- SJL/J
- 129x1/SvJ
- A/J
- AKR/J
- BALB/cJ

b

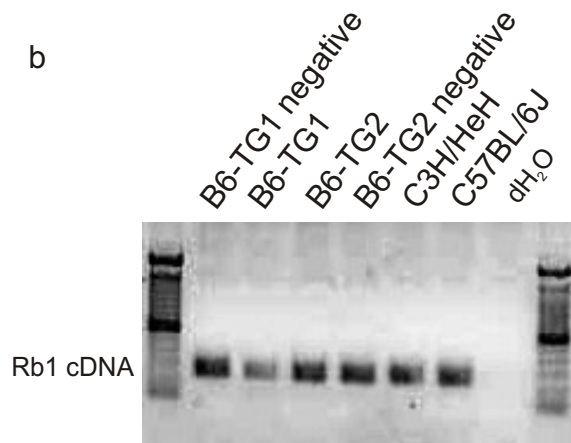

c

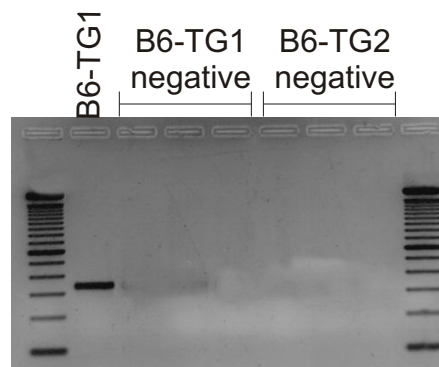

d

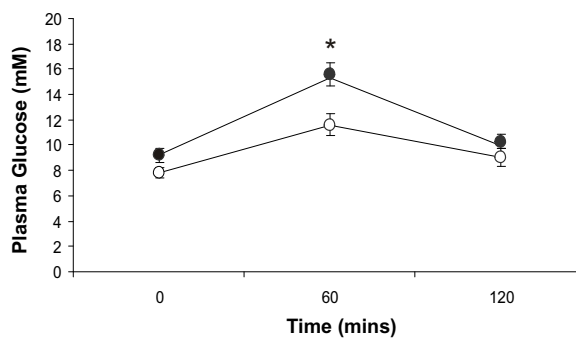

Supplement: Pg2153OnlineAppendix.pdf [file Pg2153OnlineAppendix.pdf]
